# Supplementary material for: Characterization of Retinal Function Using Microperimetry-Derived Metrics in Both Adults and Children With RPGR-Associated Retinopathy
Source: PubMed Central journal article supplement (PMC8847997; doi:10.1016/j.ajo.2021.07.018), 2022-02
Supplement: mmc1.pdf [file mmc1.pdf]

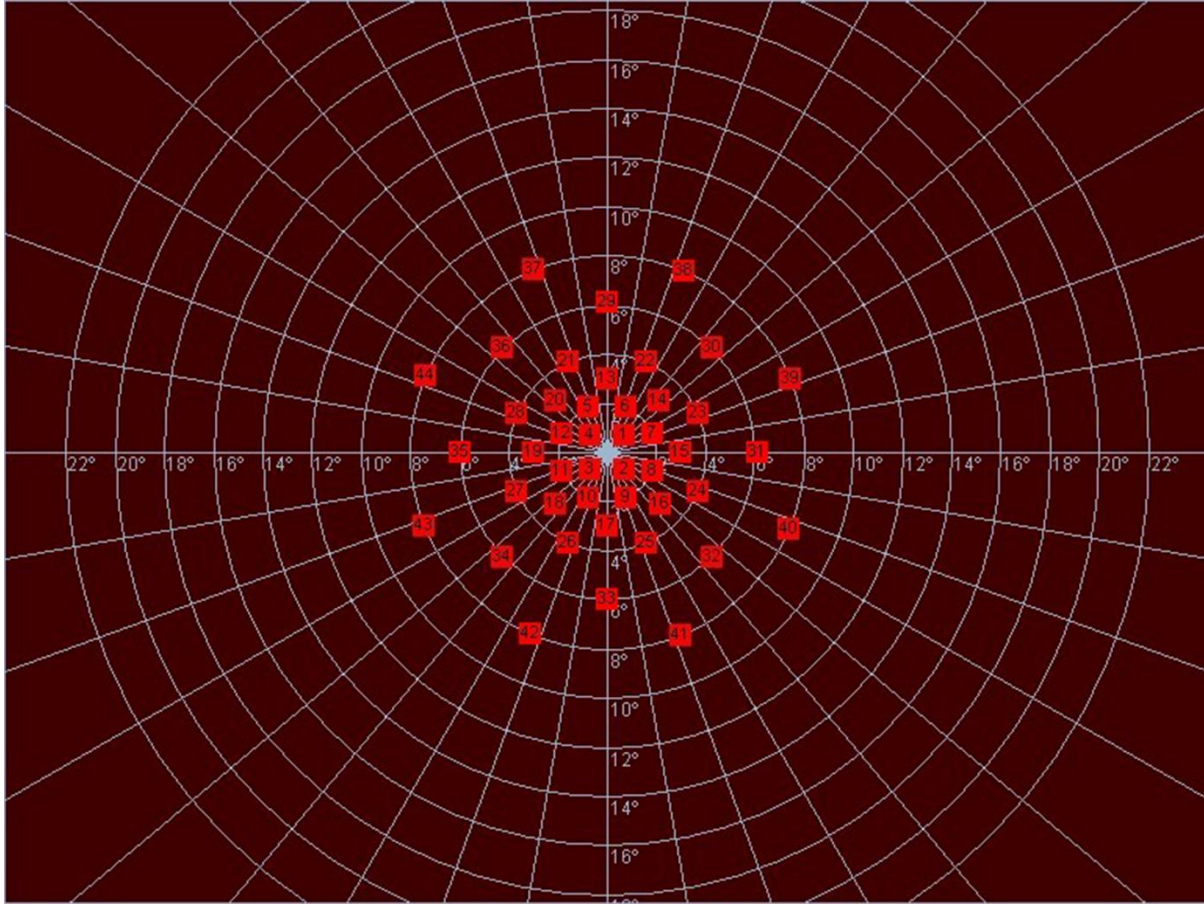

**Supplementary Figure 1: Microperimetry testing grid pattern.**

The grid consisted of 44 test locations, and was centrally condensed with radial organization to cover the fovea and peri-foveal region.
